# Supplementary material
Source: PubMed Central journal article supplement (PMC3400422)
Supplement: NIHMS389145-supplement-1_si_001.pdf [file NIHMS389145-supplement-1_si_001.pdf]

**Supporting Information**

**to**

**GeLC-MRM quantitation of mutant KRAS oncoprotein in complex biological samples**

Patrick J. Halvey, Cristina R. Ferrone and Daniel C. Liebler

Table S1

Figures S1-S4

**Table S1.** List of peptides monitored with corresponding precursor and fragment ion m/z values.

| Peptide   | Sequence     | Light/<br>Heavy | Precursor (m/z)<br>(2+) | Fragment ions<br>(m/z) (+)    |
|-----------|--------------|-----------------|-------------------------|-------------------------------|
| WT RAS    | LVVVGAGGVGK  | light           | 478.3                   | 743.4, 644.3,<br>213.2, 312.2 |
| WT RAS    | LVVVGAGGVGK  | heavy           | 482.3                   | 751.5, 652.4,<br>213.2, 312.2 |
| KRAS G12V | LVVVGAVGVGK  | light           | 499.3                   | 785.5, 686.4,<br>587.3, 213.2 |
| KRAS G12V | LVVVGAVGVGK  | heavy           | 503.3                   | 793.5, 694.4,<br>595.4, 213.2 |
| KRAS G13D | LVVVGAGDVGK  | light           | 507.3                   | 801.4, 702.4,<br>603.3, 213.2 |
| KRAS G13D | LVVVGAGDVGK  | heavy           | 511.3                   | 809.5, 710.4,<br>611.3, 213.2 |
| HRAS/NRAS | QGVEDAFYTLVR | light           | 699.4                   | 984.5, 869.5,<br>798.5, 651.4 |
| HRAS/NRAS | QGVEDAFYTLVR | heavy           | 704.4                   | 994.5, 879.5,<br>808.5, 661.4 |

WT peptide LVVVGAGGVGK (+2), m/z 478.30

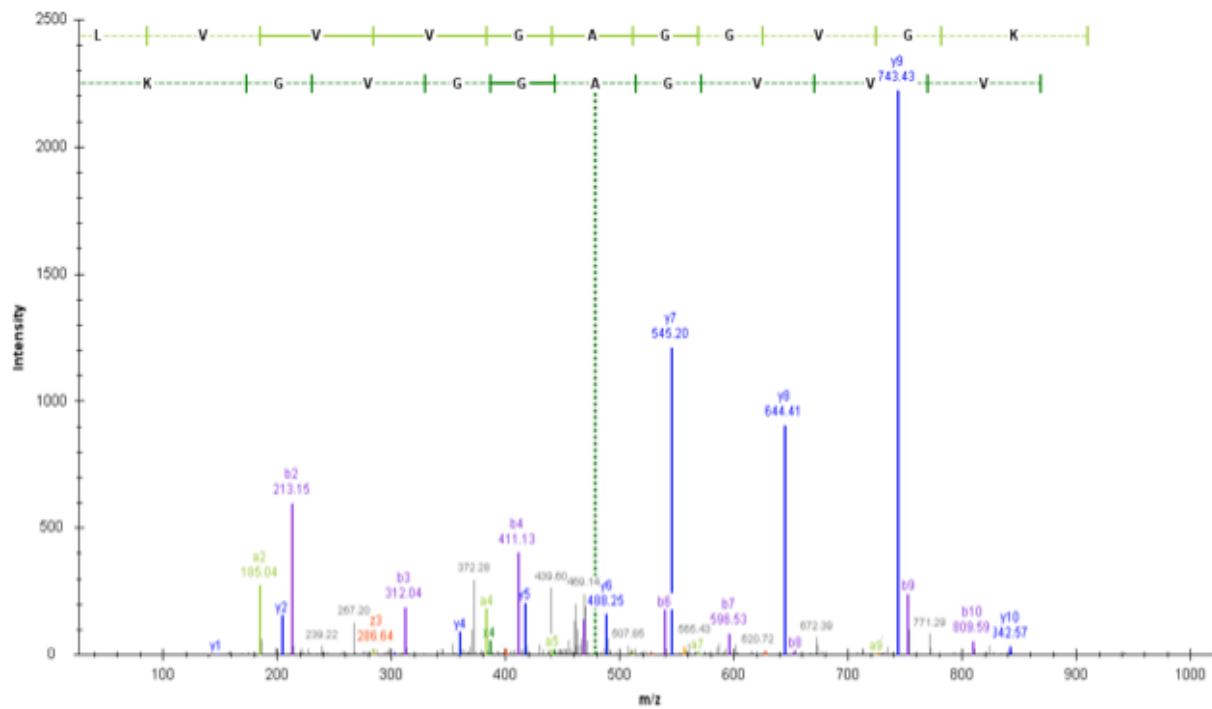

Figure S1. MS/MS spectrum for wild-type RAS peptide LVVVGAGGVGK.

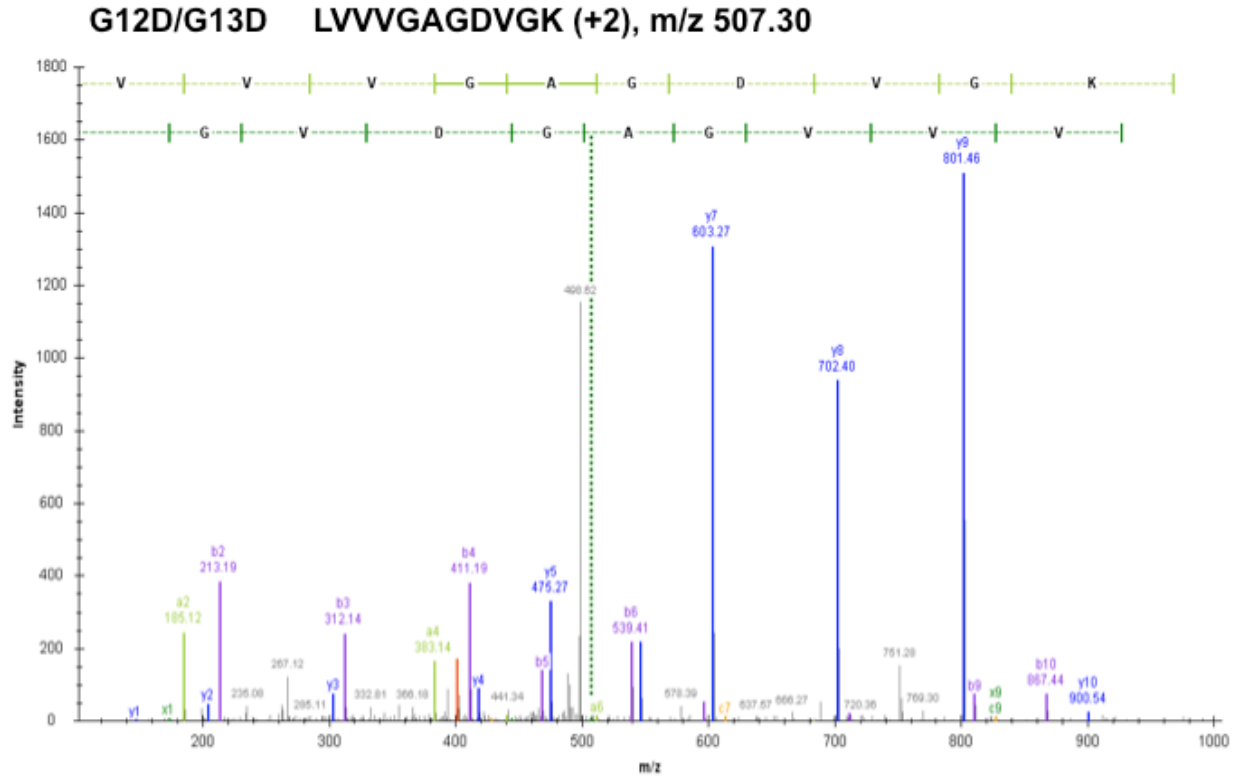

**Figure S2.** MS/MS spectrum for G13D mutant RAS peptide LVVVGAGDVGK.

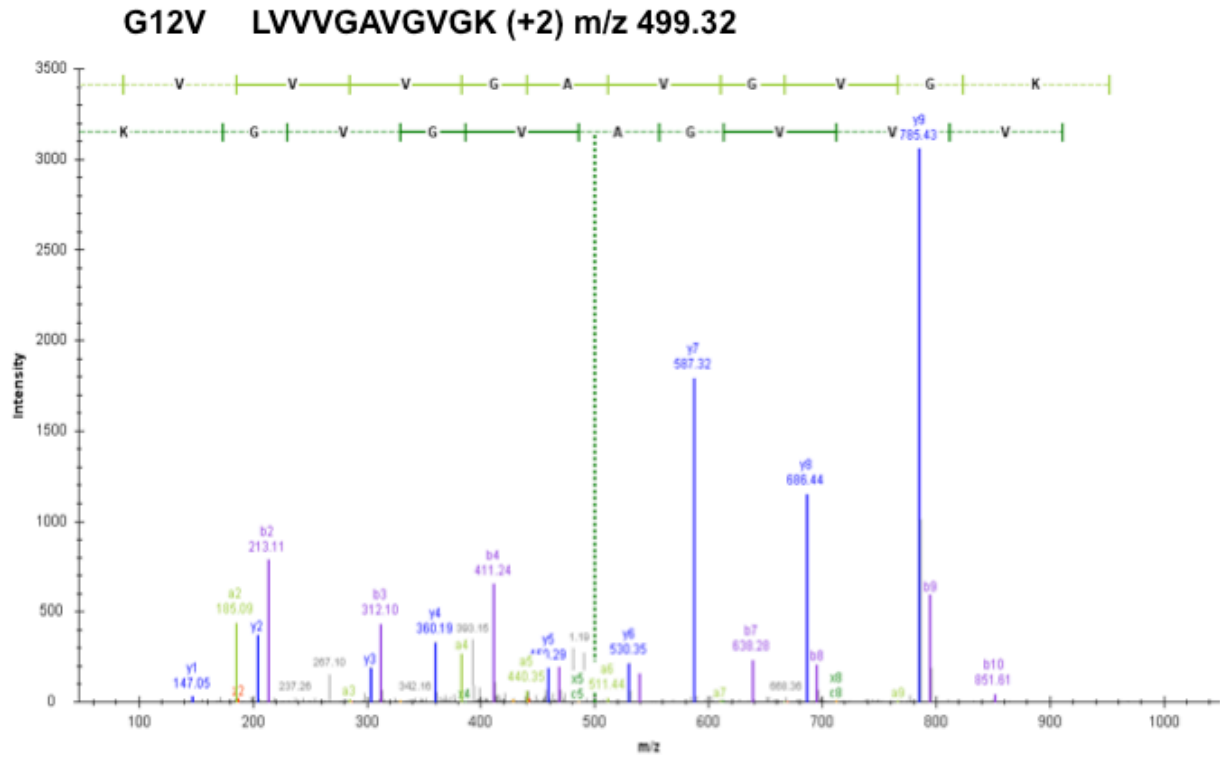

**Figure S3.** MS/MS spectrum for G12V mutant RAS peptide LVVVGAVGVGK.

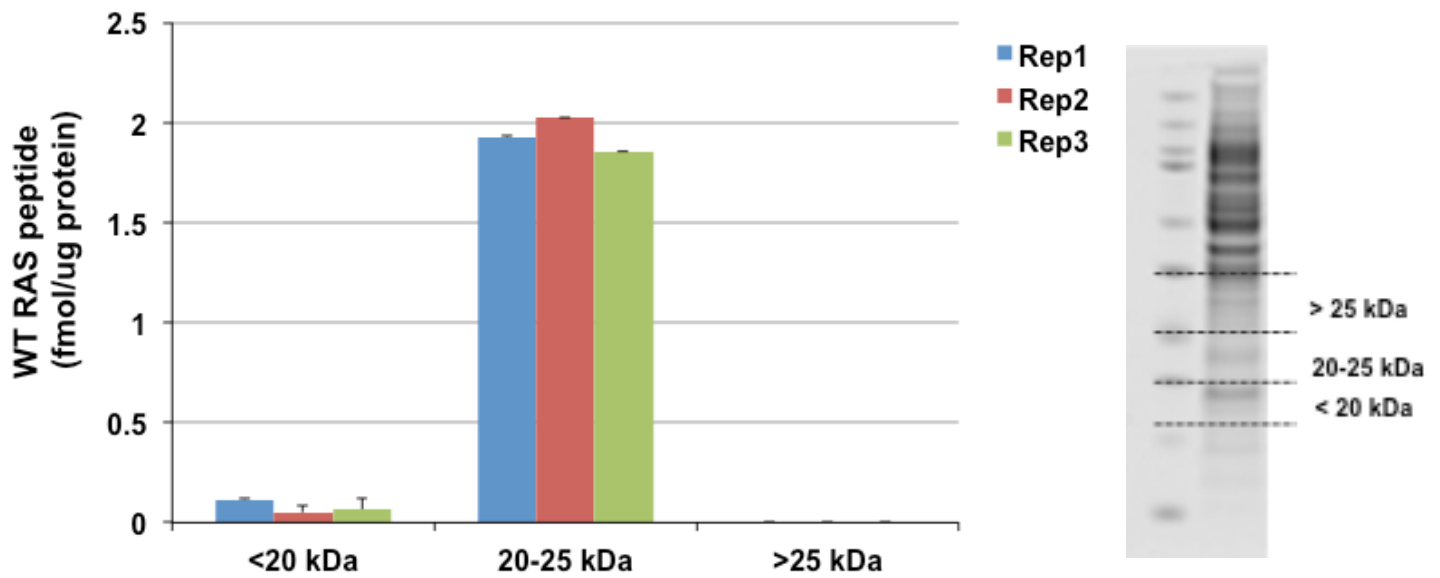

**Figure S4.** Characterization of GeLC-MRM method. Three GeLC-MRM process replicates were performed (50  $\mu$ g cell lysate per lane, three MS technical replicates per process replicate). Gel bands were excised in three groupings (>25kDa, 20-25 kDa and <20 kDa) as indicated in the photo at right.
